# Supplementary material for: Cardiovascular disease and mortality after breast cancer in postmenopausal women: Results from the Women’s Health Initiative
Source: PubMed Central journal article supplement (PMC5608205; doi:10.1371/journal.pone.0184174), 2017-09-21
Supplement: pone.0184174.s001.pdf [file pone.0184174.s001.pdf]

**S1 Table. Age at baseline and age at breast cancer among women with breast cancer.**

|                                      |       | Age at Breast Cancer |       |                  |     |       |
|--------------------------------------|-------|----------------------|-------|------------------|-----|-------|
|                                      |       | 50-59                | 60-69 | 70-79            | 80+ | Total |
| Age at<br>Study<br>Entry             | 50-59 | 640                  | 771   |                  |     | 1,411 |
|                                      | 60-69 |                      | 1,207 | 884              |     | 2,091 |
|                                      | 70-79 |                      |       | 618 <sup>a</sup> | 220 | 838   |
| Total                                |       | 640                  | 1,978 | 1,502            | 220 | 4,340 |
| With Complete Staging<br>Information |       | 627                  | 1,957 | 1,482            |     | 4,066 |

<sup>a</sup> n = 212 for age 70-74.9, and n = 406 for age 75-79.9 at breast cancer diagnosis.
