# Supplementary material for: Cardiovascular disease and mortality after breast cancer in postmenopausal women: Results from the Women’s Health Initiative
Source: PubMed Central journal article supplement (PMC5608205; doi:10.1371/journal.pone.0184174), 2017-09-21
Supplement: pone.0184174.s002.pdf [file pone.0184174.s002.pdf]

**S2 Table. Study entry characteristics and cardiovascular disease (CVD) risk factors by CVD status in women without incident breast cancer.**

|                        | <b>Women without Incident Breast Cancer</b> |                                    |                |
|------------------------|---------------------------------------------|------------------------------------|----------------|
|                        | <b>(n = 97,576)</b>                         |                                    |                |
|                        | <b>No CVD since study entry n (%)</b>       | <b>CVD since study entry n (%)</b> | <b>p value</b> |
| <b>Age at Entry</b>    |                                             |                                    |                |
| 50 – 59 years          | 33,490 (39.35)                              | 2,305 (18.48)                      |                |
| 60 – 69 years          | 38,323 (45.03)                              | 6,215 (49.83)                      |                |
| 70 – 79 years          | 13,291 (15.62)                              | 3,952 (31.69)                      | < .0001        |
| <b>Race/Ethnicity</b>  |                                             |                                    |                |
| White                  | 73,389 (86.42)                              | 10,815 (86.94)                     |                |
| Black                  | 5,779 (6.81)                                | 999 (8.03)                         |                |
| Hispanic               | 2,669 (3.14)                                | 297 (2.39)                         |                |
| Asian/Pacific Islander | 1,939 (2.28)                                | 166 (1.33)                         |                |
| American Indian        | 280 (0.33)                                  | 39 (0.31)                          |                |
| Other                  | 863 (1.02)                                  | 124 (1.00)                         | < .0001        |
| <b>Education</b>       |                                             |                                    |                |
| Less than high school  | 27,778 (3.29)                               | 681 (5.51)                         |                |
| High school diploma    | 13,180 (15.59)                              | 2,504 (20.27)                      |                |
| Some college           | 30,881 (36.53)                              | 4,852 (39.27)                      |                |

|                                           |                |               |         |
|-------------------------------------------|----------------|---------------|---------|
| College degree or higher                  | 37,698 (44.59) | 4,319 (34.95) | < .0001 |
| <b>Study Arm</b>                          |                |               |         |
| Clinical Trial                            | 38,268 (44.97) | 6,193 (49.66) |         |
| Observational                             | 46,836 (55.03) | 6,279 (50.34) | < .0001 |
| <b>Body Mass Index (kg/m<sup>2</sup>)</b> |                |               |         |
| < 25                                      | 32,424 (38.43) | 3,659 (29.6)  |         |
| 25.0 – 29.9                               | 29,484 (34.95) | 4,511 (36.49) |         |
| 30.0 – 34.9                               | 14,280 (16.93) | 2,585 (20.91) |         |
| 35 – 39.9                                 | 5,444 (6.45)   | 1,066 (8.62)  |         |
| ≥ 40                                      | 2,740 (3.25)   | 540 (4.37)    | < .0001 |
| <b>Waist Circumference</b>                |                |               |         |
| ≤ 88 cm                                   | 55,146 (65.03) | 6,587 (53.01) |         |
| > 88 cm                                   | 29,652 (34.97) | 5,840 (46.99) | < .0001 |
| <b>Smoking</b>                            |                |               |         |
| Never                                     | 44,038 (52.3)  | 6,011(48.77)  |         |
| Past                                      | 35,423 (42.07) | 5,211 (42.28) |         |
| Current                                   | 4,738 (5.63)   | 1,102 (8.94)  | < .0001 |
| <b>Hypertension</b>                       |                |               |         |
| No                                        | 58,814 (72.86) | 6,416 (55.01) |         |

|                                                 |                |               |         |
|-------------------------------------------------|----------------|---------------|---------|
| Yes & untreated                                 | 5,837 (7.23)   | 1,180 (10.12) |         |
| Yes & treated                                   | 16,073 (19.91) | 4,067 (34.87) | < .0001 |
| <b>Diabetes</b>                                 |                |               |         |
| No                                              | 82,297 (96.76) | 11,340 (91)   |         |
| Yes                                             | 2,760 (3.24)   | 1,121 (9)     | < .0001 |
| <b>Hypercholesterolemia</b>                     |                |               |         |
| No                                              | 71,522 (89.15) | 9,711 (83.55) |         |
| Yes                                             | 8,707 (10.85)  | 1,912 (16.45) | < .0001 |
| <b>Physical Activity (total MET-hours/week)</b> |                |               |         |
| < 2.5                                           | 18,761 (23.1)  | 3,269 (27.8)  |         |
| 2.5 – 18.24                                     | 40,641 (50.04) | 5,951 (50.62) |         |
| ≥ 18.25                                         | 21,815 (26.86) | 2,537 (21.58) | < .0001 |
| <b>Menopausal Hormone Therapy</b>               |                |               |         |
| Never                                           | 35,052 (41.21) | 5,922 (47.54) |         |
| Past                                            | 12,597 (14.81) | 2,276 (18.27) |         |
| Current                                         | 37,400 (43.97) | 4,259 (34.19) | < .0001 |

MET indicates metabolic equivalent score.

**S3 Table. Breast cancer characteristics by cardiovascular disease (CVD) status in women with invasive breast cancer.**

|                                                 | <b>Total</b>  | <b>No CVD</b> |          | <b>CVD after Incident Breast Cancer</b> |          | <b>p value</b>       |                      |
|-------------------------------------------------|---------------|---------------|----------|-----------------------------------------|----------|----------------------|----------------------|
| <b>Age at Breast Cancer</b><br>Years, Mean ± SD | 68.03 ± 7.19  | 67.8 ± 7.2    |          | 70.3 ± 6.9                              |          | < .0001              |                      |
|                                                 | <b>n (%)</b>  | <b>n</b>      | <b>%</b> | <b>n</b>                                | <b>%</b> | <b>p<sup>a</sup></b> | <b>p<sup>b</sup></b> |
| <b>Stage</b>                                    |               |               |          |                                         |          |                      |                      |
| Localized                                       | 3,262 (75.16) | 2,994         | 75.21    | 268                                     | 74.65    |                      |                      |
| Regional                                        | 987 (22.74)   | 902           | 22.66    | 85                                      | 23.68    |                      |                      |
| Distant                                         | 29 (0.67)     | 27            | 0.68     | 2                                       | 0.56     |                      |                      |
| Unknown/missing                                 | 62 (1.43)     | 58            | 1.46     | 4                                       | 1.11     | 0.92                 | 0.89                 |
| <b>Tumor Size</b>                               |               |               |          |                                         |          |                      |                      |
| ≤ 5 mm                                          | 531 (12.24)   | 493           | 12.38    | 38                                      | 10.58    |                      |                      |
| 5.1 – 10 mm                                     | 1,136 (26.18) | 1,051         | 26.40    | 85                                      | 23.68    |                      |                      |
| 10.1 – 20 mm                                    | 1,678 (38.66) | 1,524         | 38.28    | 154                                     | 42.90    |                      |                      |
| > 20 mm                                         | 793 (18.27)   | 725           | 18.21    | 68                                      | 18.94    |                      |                      |
| Missing                                         | 202 (4.65)    | 188           | 4.72     | 14                                      | 3.90     | 0.38                 | 0.30                 |
| <b>Positive Lymph Nodes</b>                     |               |               |          |                                         |          |                      |                      |
| No                                              | 2,975 (68.55) | 2,741         | 68.85    | 234                                     | 65.18    |                      |                      |
| Yes                                             | 941 (21.68)   | 861           | 21.63    | 80                                      | 22.28    |                      |                      |
| Unknown/missing                                 | 424 (9.77)    | 379           | 9.52     | 45                                      | 12.53    | 0.15                 | 0.53                 |
| <b>Grade</b>                                    |               |               |          |                                         |          |                      |                      |
| Well differentiated                             | 1,149 (26.47) | 1,064         | 26.73    | 85                                      | 23.68    |                      |                      |
| Moderately differentiated                       | 1,673 (38.55) | 1,537         | 38.61    | 136                                     | 37.88    |                      |                      |
| Poorly differentiated                           | 947 (21.82)   | 859           | 21.58    | 88                                      | 24.51    | 0.59                 | 0.47                 |
