# Supplementary material for: Cardiovascular disease and mortality after breast cancer in postmenopausal women: Results from the Women’s Health Initiative
Source: PubMed Central journal article supplement (PMC5608205; doi:10.1371/journal.pone.0184174), 2017-09-21
Supplement: pone.0184174.s003.pdf [file pone.0184174.s003.pdf]

**S3 Table. Breast cancer characteristics by cardiovascular disease (CVD) status in women with invasive breast cancer.**

|                             | <b>Total</b>  | <b>No CVD</b> |          | <b>CVD after Incident Breast Cancer</b> |          | <b>p value</b>       |                      |
|-----------------------------|---------------|---------------|----------|-----------------------------------------|----------|----------------------|----------------------|
| <b>Age at Breast Cancer</b> |               |               |          |                                         |          |                      |                      |
| Years, Mean ± SD            | 68.03 ± 7.19  | 67.8 ± 7.2    |          | 70.3 ± 6.9                              |          | < .0001              |                      |
|                             | <b>n (%)</b>  | <b>n</b>      | <b>%</b> | <b>n</b>                                | <b>%</b> | <b>p<sup>a</sup></b> | <b>p<sup>b</sup></b> |
| <b>Stage</b>                |               |               |          |                                         |          |                      |                      |
| Localized                   | 3,262 (75.16) | 2,994         | 75.21    | 268                                     | 74.65    |                      |                      |
| Regional                    | 987 (22.74)   | 902           | 22.66    | 85                                      | 23.68    |                      |                      |
| Distant                     | 29 (0.67)     | 27            | 0.68     | 2                                       | 0.56     |                      |                      |
| Unknown/missing             | 62 (1.43)     | 58            | 1.46     | 4                                       | 1.11     | 0.92                 | 0.89                 |
| <b>Tumor Size</b>           |               |               |          |                                         |          |                      |                      |
| ≤ 5 mm                      | 531 (12.24)   | 493           | 12.38    | 38                                      | 10.58    |                      |                      |
| 5.1 – 10 mm                 | 1,136 (26.18) | 1,051         | 26.40    | 85                                      | 23.68    |                      |                      |
| 10.1 – 20 mm                | 1,678 (38.66) | 1,524         | 38.28    | 154                                     | 42.90    |                      |                      |
| > 20 mm                     | 793 (18.27)   | 725           | 18.21    | 68                                      | 18.94    |                      |                      |
| Missing                     | 202 (4.65)    | 188           | 4.72     | 14                                      | 3.90     | 0.38                 | 0.30                 |
| <b>Positive Lymph Nodes</b> |               |               |          |                                         |          |                      |                      |
| No                          | 2,975 (68.55) | 2,741         | 68.85    | 234                                     | 65.18    |                      |                      |
| Yes                         | 941 (21.68)   | 861           | 21.63    | 80                                      | 22.28    |                      |                      |
| Unknown/missing             | 424 (9.77)    | 379           | 9.52     | 45                                      | 12.53    | 0.15                 | 0.53                 |
| <b>Grade</b>                |               |               |          |                                         |          |                      |                      |
| Well differentiated         | 1,149 (26.47) | 1,064         | 26.73    | 85                                      | 23.68    |                      |                      |
| Moderately differentiated   | 1,673 (38.55) | 1,537         | 38.61    | 136                                     | 37.88    |                      |                      |
| Poorly differentiated       | 947 (21.82)   | 859           | 21.58    | 88                                      | 24.51    | 0.59                 | 0.47                 |

|                              |               |       |       |     |       |      |      |
|------------------------------|---------------|-------|-------|-----|-------|------|------|
| Anaplastic                   | 101 (2.33)    | 93    | 2.34  | 8   | 2.23  |      |      |
| Unknown/not done/missing     | 470 (10.83)   | 428   | 10.75 | 42  | 11.70 |      |      |
| <b>Laterality</b>            |               |       |       |     |       |      |      |
| Right                        | 2,129 (49.06) | 1,959 | 49.21 | 170 | 47.35 |      |      |
| Left                         | 2,183 (50.30) | 1,994 | 50.09 | 189 | 52.65 |      |      |
| Paired site/mid line tumor   | 5 (0.12)      | 5     | 0.13  | 0   | 0.00  |      |      |
| Missing                      | 23 (0.53)     | 23    | 0.58  | 0   | 0.00  | 0.47 | 0.58 |
| <b>Estrogen Receptor</b>     |               |       |       |     |       |      |      |
| Positive                     | 3,405 (78.46) | 3,120 | 78.37 | 285 | 79.39 |      |      |
| Negative                     | 571 (13.16)   | 527   | 13.24 | 44  | 12.26 |      |      |
| Borderline                   | 10 (0.23)     | 10    | 0.25  | 0   | 0.00  |      |      |
| Unknown/not done/missing     | 354 (8.16)    | 324   | 8.14  | 30  | 8.36  | 0.75 | 0.55 |
| <b>Progesterone Receptor</b> |               |       |       |     |       |      |      |
| Positive                     | 2,820 (64.98) | 2,596 | 65.21 | 224 | 62.40 |      |      |
| Negative                     | 1,092 (25.16) | 996   | 25.02 | 96  | 26.74 |      |      |
| Borderline                   | 26 (0.60)     | 23    | 0.58  | 3   | 0.84  |      |      |
| Unknown/not done/missing     | 402 (9.26)    | 366   | 9.19  | 36  | 10.03 | 0.71 | 0.57 |
| <b>HER2</b>                  |               |       |       |     |       |      |      |
| Positive                     | 485 (11.18)   | 458   | 11.50 | 27  | 7.52  |      |      |
| Negative                     | 2,397 (55.23) | 2,202 | 55.31 | 195 | 54.32 |      |      |
| Borderline                   | 31 (0.71)     | 29    | 0.73  | 2   | 0.56  |      |      |
| Unknown/not done/missing     | 1,427 (32.88) | 1,292 | 32.45 | 135 | 37.60 | 0.06 | 0.15 |

HER2 indicates human epidermal growth factor receptor 2.

<sup>a</sup> Chi-square test included missing category.

<sup>b</sup> Chi-square test did not include missing category.
