# Supplementary material for: Cardiovascular disease and mortality after breast cancer in postmenopausal women: Results from the Women’s Health Initiative
Source: PubMed Central journal article supplement (PMC5608205; doi:10.1371/journal.pone.0184174), 2017-09-21
Supplement: pone.0184174.s004.pdf [file pone.0184174.s004.pdf]

**S4 Table. Survival status and cause of death in women with invasive breast cancer at ages 50-59 and 60-69.**

|                               | Breast Cancer Diagnosis at Age 50-59 |                   |                  |              | Breast Cancer Diagnosis at Age 60-69 |                   |                  |              |
|-------------------------------|--------------------------------------|-------------------|------------------|--------------|--------------------------------------|-------------------|------------------|--------------|
| Survival status               | Localized<br>n (%)                   | Regional<br>n (%) | Distant<br>n (%) | All<br>n (%) | Localized<br>n (%)                   | Regional<br>n (%) | Distant<br>n (%) | All<br>n (%) |
| <b>Alive</b>                  | 411 (92.2)                           | 152 (86.4)        | 1 (20.0)         | 564 (90.0)   | 1,343 (90.8)                         | 380 (81.7)        | 7 (53.9)         | 1,730 (88.4) |
| <b>Dead</b>                   | 35 (7.9)                             | 24 (13.6)         | 4 (80.0)         | 63 (10.0)    | 136 (9.2)                            | 85 (18.3)         | 6 (46.1)         | 227 (11.6)   |
| <b>Total (%)</b>              | 446 (71.1)                           | 176 (28.1)        | 5 (0.8)          | 627 (100)    | 1,479 (75.6)                         | 465 (23.8)        | 13 (6.6)         | 1,957 (100)  |
| Causes of Death               | Localized<br>n (%)                   | Regional<br>n (%) | Distant<br>n (%) | All<br>n (%) | Localized<br>n (%)                   | Regional<br>n (%) | Distant<br>n (%) | All<br>n (%) |
| <b>Breast Cancer</b>          | 14 (40.0)                            | 18 (75.0)         | 4 (100)          | 36 (57.1)    | 34 (25.0)                            | 56 (65.9)         | 4 (66.7)         | 94 (41.4)    |
| <b>Other Major Cancers</b>    | 1 (2.9)                              | 0 (0.0)           | 0 (0.0)          | 1 (1.6)      | 18 (13.2)                            | 2 (2.4)           | 0 (0.0)          | 20 (8.8)     |
| <b>Other Cancer Death</b>     | 5 (14.3)                             | 1 (4.2)           | 0 (0.0)          | 6 (9.5)      | 17 (12.5)                            | 7 (8.2)           | 0 (0.0)          | 24 (10.6)    |
| <b>Total CVD</b>              | 5 (14.3)                             | 2 (8.3)           | 0 (0.0)          | 7 (11.1)     | 8 (5.9)                              | 5 (5.9)           | 1 (16.7)         | 14 (6.2)     |
| <b>Coronary heart disease</b> | 1 (2.9)                              | 1 (4.2)           | 0 (0.0)          | 2 (3.2)      | 3 (2.2)                              | 3 (3.5)           | 0 (0.0)          | 6 (2.6)      |
| <b>Stroke</b>                 | 2 (5.7)                              | 0 (0.0)           | 0 (0.0)          | 2 (3.2)      | 2 (1.5)                              | 0 (0.0)           | 0 (0.0)          | 2 (0.9)      |

|                  |           |          |         |           |           |           |          |           |
|------------------|-----------|----------|---------|-----------|-----------|-----------|----------|-----------|
| <b>Other CVD</b> | 2 (5.7)   | 1 (4.2)  | 0 (0.0) | 3 (4.8)   | 3 (2.2)   | 2 (2.4)   | 1 (16.7) | 6 (2.6)   |
| <b>Others</b>    | 10 (28.6) | 3 (12.5) | 0 (0.0) | 13 (20.6) | 59 (43.4) | 15 (17.7) | 1 (16.7) | 75 (33.0) |

CVD indicates cardiovascular disease.
